# Supplementary figures and images for: Prenatal and Peripartum Exposure to Antibiotics and Cesarean Section Delivery Are Associated with Differences in Diversity and Composition of the Infant Meconium Microbiome
Source: MDPI journal article supplement (doi:10.3390/microorganisms8020179), 2020-01-27

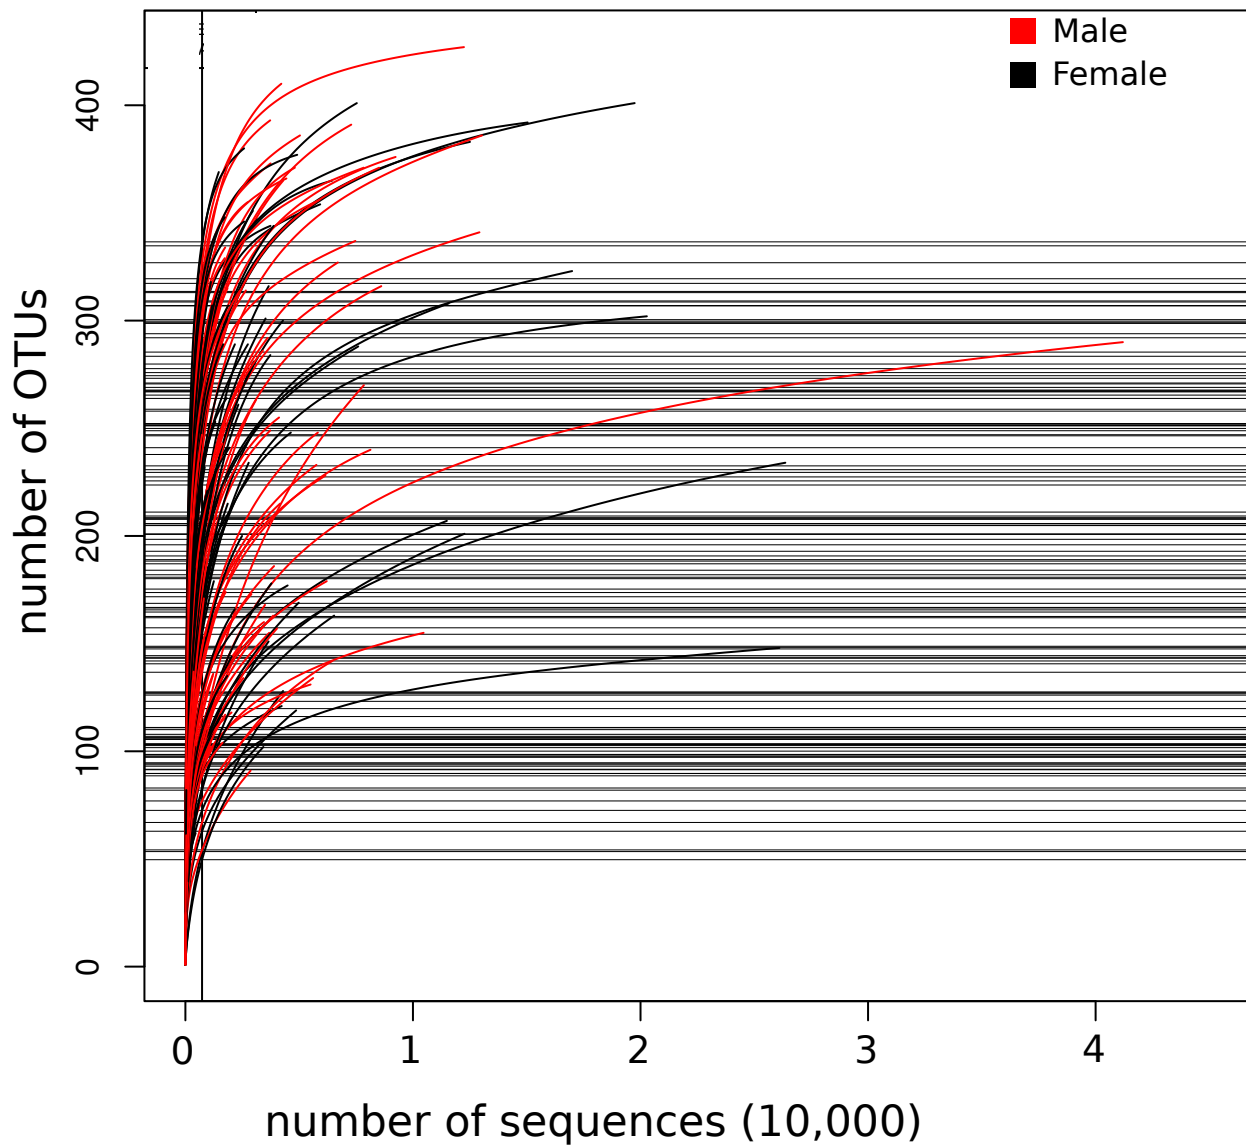

Supplement: s1 [file s1]
